# Supplementary material for: Neuropilin 1 is expressed on thymus-derived natural regulatory T cells, but not mucosa-generated induced Foxp3+ T reg cells
Source: PubMed Central journal article supplement — J Exp Med. 2012 Sep 24;209(10):1723–42. doi: 10.1084/jem.20120914 (PMC3457733; doi:10.1084/jem.20120914), 2012-09-24
Supplement: supp_jem.20120914_JEM_201210914_sm.pdf [file supp_jem.20120914_JEM_201210914_sm.pdf]

SUPPLEMENTAL MATERIAL

Weiss et al., <http://www.jem.org/cgi/content/full/jem.20120914/DC1>

**Table S1.** Methylation pattern of the T reg cell-specific demethylated region in different T reg cell populations

| CPG-ID | CD4 <sup>+</sup> Foxp3-<br>GFP <sup>-</sup> | Total T reg<br>cells<br>Foxp3-GFP <sup>+</sup> | Nrp1 <sup>+</sup> T reg<br>cells<br>Foxp3-GFP <sup>+</sup> | Nrp1 <sup>-</sup> T reg<br>cells Foxp3-<br>GFP <sup>+</sup> | OVA-iT reg<br>cells<br>Foxp3-GFP <sup>+</sup> |
|--------|---------------------------------------------|------------------------------------------------|------------------------------------------------------------|-------------------------------------------------------------|-----------------------------------------------|
| 38     | 100                                         | 42                                             | 0                                                          | 38                                                          | NA                                            |
| 74     | 100                                         | 41                                             | 0                                                          | 55                                                          | 37                                            |
| 90     | 100                                         | 31                                             | 0                                                          | 59                                                          | 32                                            |
| 124    | 97                                          | 28                                             | 0                                                          | 41                                                          | 22                                            |
| 151    | 94                                          | 10                                             | 0                                                          | 39                                                          | 20                                            |
| 156    | 97                                          | 12                                             | 0                                                          | 38                                                          | 21                                            |
| 205    | 95                                          | 18                                             | 0                                                          | 41                                                          | 32                                            |
| 224    | 94                                          | 0                                              | 0                                                          | 38                                                          | 40                                            |
| 228    | 100                                         | 54                                             | 0                                                          | 49                                                          | 42                                            |
| 236    | 100                                         | 46                                             | 0                                                          | 41                                                          | 42                                            |
| 298    | 94                                          | 9                                              | 0                                                          | 17                                                          | 28                                            |

**Table S2.** List of the PCR primers used for qPCR in Figs 1, 3, 4, 7, and 8

| Gene       | Forward                        | Reverse                        |
|------------|--------------------------------|--------------------------------|
| Dapl1      | 5' -GCAGTGAAAGCTGGAGGGATGCG-3' | 5' -TGTGCCGTGTGAACTGTCGCTG-3'  |
| Foxp3      | 5' -GGCCCTTCTCCAGGACAGA-3'     | 5' -GCTGATCATGGCTGGGTGTG-3'    |
| Helios     | 5' -ACACCTCAGGACCCATTCTG-3'    | 5' -TCCATGCTGACATTCTGGAG-3'    |
| Igfbp4     | 5' -TTCATCATCCCCATTCCAAAC-3'   | 5' -ACCCCTGTCTTCCGATCCA-3'     |
| Nrp1       | 5' -GACAAATGTGGCGGGACCATA-3'   | 5' -TGGATTAGCCATTCACACTTCTC-3' |
| Swap70     | 5' -TGACACAGTTATGGGAAAGG-3'    | 5' -ACGAACTGCTCAAAGCCATT-3'    |
| Beta Actin | 5' -GTCCACCTTCCAGCAGATGT-3'    | 5' -AAGGGTGTAACGCAGCTCAG-3'    |
